# Supplementary material for: Multivalent dithiafulvenyl functionalization of dendritic oligo(phenylene vinylene)s with an anthraquinodimethane core
Source: Royal Society of Chemistry journal article supplement (doi:10.1039/c6cc10085f), 2017-01-01

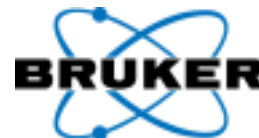

## • Diffusion Analysis

|                      |                            |
|----------------------|----------------------------|
| sample name:         | MK85                       |
| Description/Title:   | Diffusion of MK85 in CDCl3 |
| Origin:              | dave davidson              |
| Date of preparation: | 04 / 2016                  |
| Lab Book Number:     | 000                        |

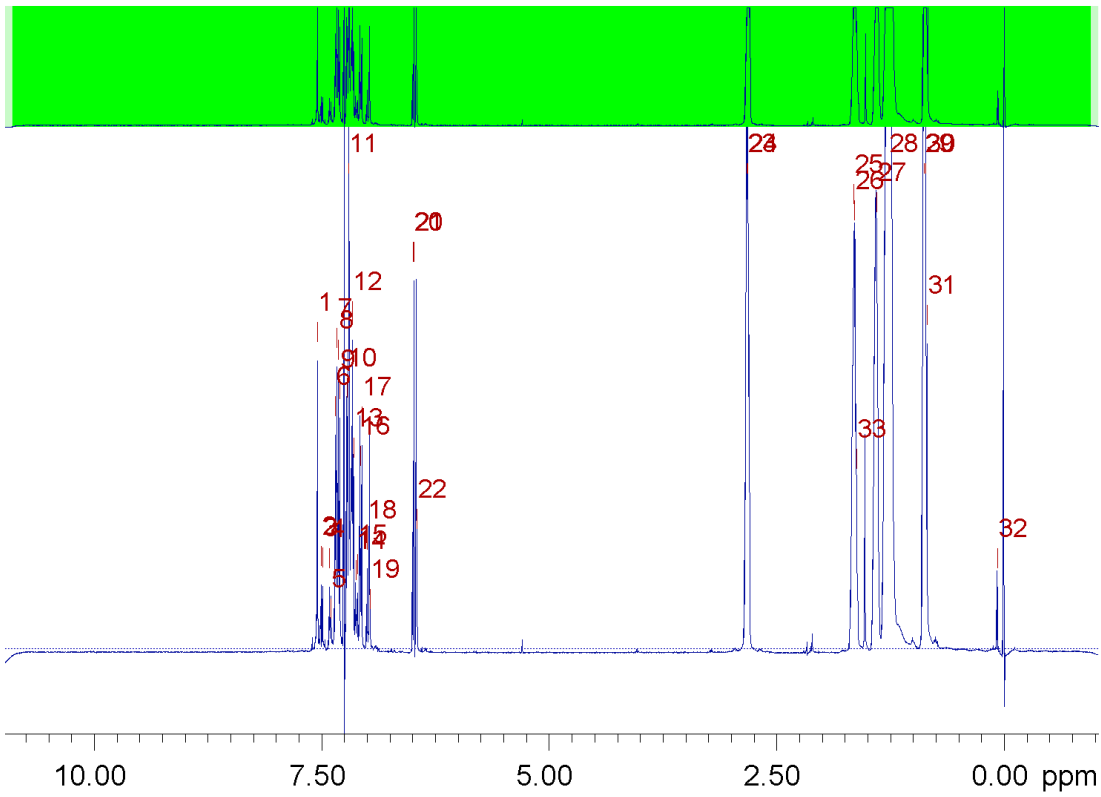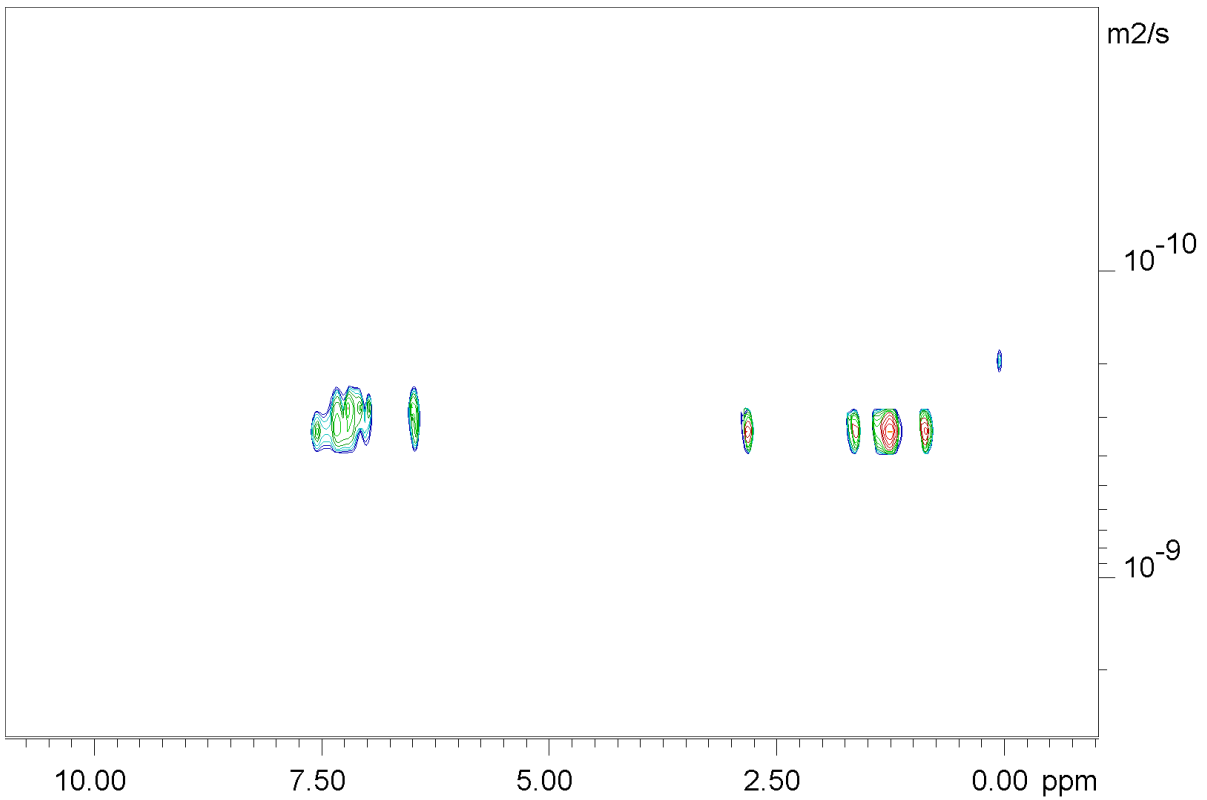

|                                        |                                                                                                                 |
|----------------------------------------|-----------------------------------------------------------------------------------------------------------------|
| Fitted function:                       | $f(x) = A * \exp(-D * x^2 * \gamma^2 * \text{littleDelta}^2 / (\text{bigDelta} - \text{littleDelta}/3) * 10^4)$ |
| used gamma:                            | 26752 rad/(s*Gauss)                                                                                             |
| used little delta:                     | 0.0040000 s                                                                                                     |
| used big delta:                        | 0.094070 s                                                                                                      |
| used gradient strength:                | variable                                                                                                        |
| Random error estimation of data:       | RMS per spectrum (or trace/plane)                                                                               |
| Systematic error estimation of data:   | worst case per peak scenario                                                                                    |
| Fit parameter Error estimation method: | from fit using arbitrary y uncertainties                                                                        |
| Confidence level:                      | 95%                                                                                                             |
| Used peaks:                            | automatically picked peaks                                                                                      |
| Used integrals:                        | peak intensities                                                                                                |
| Used Gradient strength:                | all values (including replicates) used                                                                          |

| Peak name | F2 [ppm] | D [m2/s] | error     |
|-----------|----------|----------|-----------|
| 1         | 7.545    | 3.17e-10 | 1.838e-11 |
| 2         | 7.507    | 3.12e-10 | 2.216e-11 |
| 3         | 7.489    | 3.24e-10 | 4.485e-12 |
| 4         | 7.413    | 3.29e-10 | 5.600e-12 |
| 5         | 7.395    | 3.23e-10 | 9.588e-12 |
| 6         | 7.348    | 3.01e-10 | 3.102e-12 |
| 7         | 7.334    | 3.13e-10 | 1.809e-12 |
| 8         | 7.316    | 3.10e-10 | 4.070e-12 |
| 9         | 7.301    | 3.03e-10 | 6.062e-12 |
| 10        | 7.222    | 3.26e-10 | 5.614e-12 |
| 11        | 7.202    | 3.00e-10 | 5.214e-12 |
| 12        | 7.164    | 3.02e-10 | 1.788e-12 |
| 13        | 7.149    | 3.05e-10 | 4.036e-12 |
| 14        | 7.125    | 3.23e-10 | 1.012e-11 |
| 15        | 7.108    | 3.17e-10 | 1.021e-11 |
| 16        | 7.076    | 2.94e-10 | 1.140e-11 |
| 17        | 7.058    | 2.98e-10 | 2.373e-12 |
| 18        | 6.999    | 3.24e-10 | 2.305e-12 |
| 19        | 6.970    | 2.94e-10 | 5.711e-12 |
| 20        | 6.498    | 3.16e-10 | 3.782e-12 |
| 21        | 6.483    | 2.92e-10 | 7.890e-12 |
| 22        | 6.457    | 3.04e-10 | 1.141e-11 |
| 23        | 2.828    | 3.17e-10 | 2.620e-12 |
| 24        | 2.816    | 3.15e-10 | 2.527e-12 |
| 25        | 1.654    | 3.13e-10 | 3.220e-12 |
| 26        | 1.640    | 3.13e-10 | 2.638e-12 |
| 27        | 1.402    | 3.14e-10 | 6.125e-12 |
| 28        | 1.267    | 3.26e-10 | 6.919e-12 |
| 29        | 0.880    | 3.14e-10 | 2.331e-12 |
| 30        | 0.859    | 3.13e-10 | 1.554e-12 |

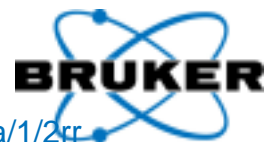

| Peak name | F2 [ppm] | D [m <sup>2</sup> /s] | error     |
|-----------|----------|-----------------------|-----------|
| 31        | 0.845    | 3.21e-10              | 1.564e-11 |
| 32        | 0.073    | 1.97e-10              | 1.368e-11 |
| 33        | 1.622    | 3.08e-10              | 2.067e-12 |

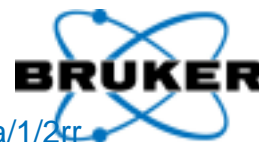

### Current fit display

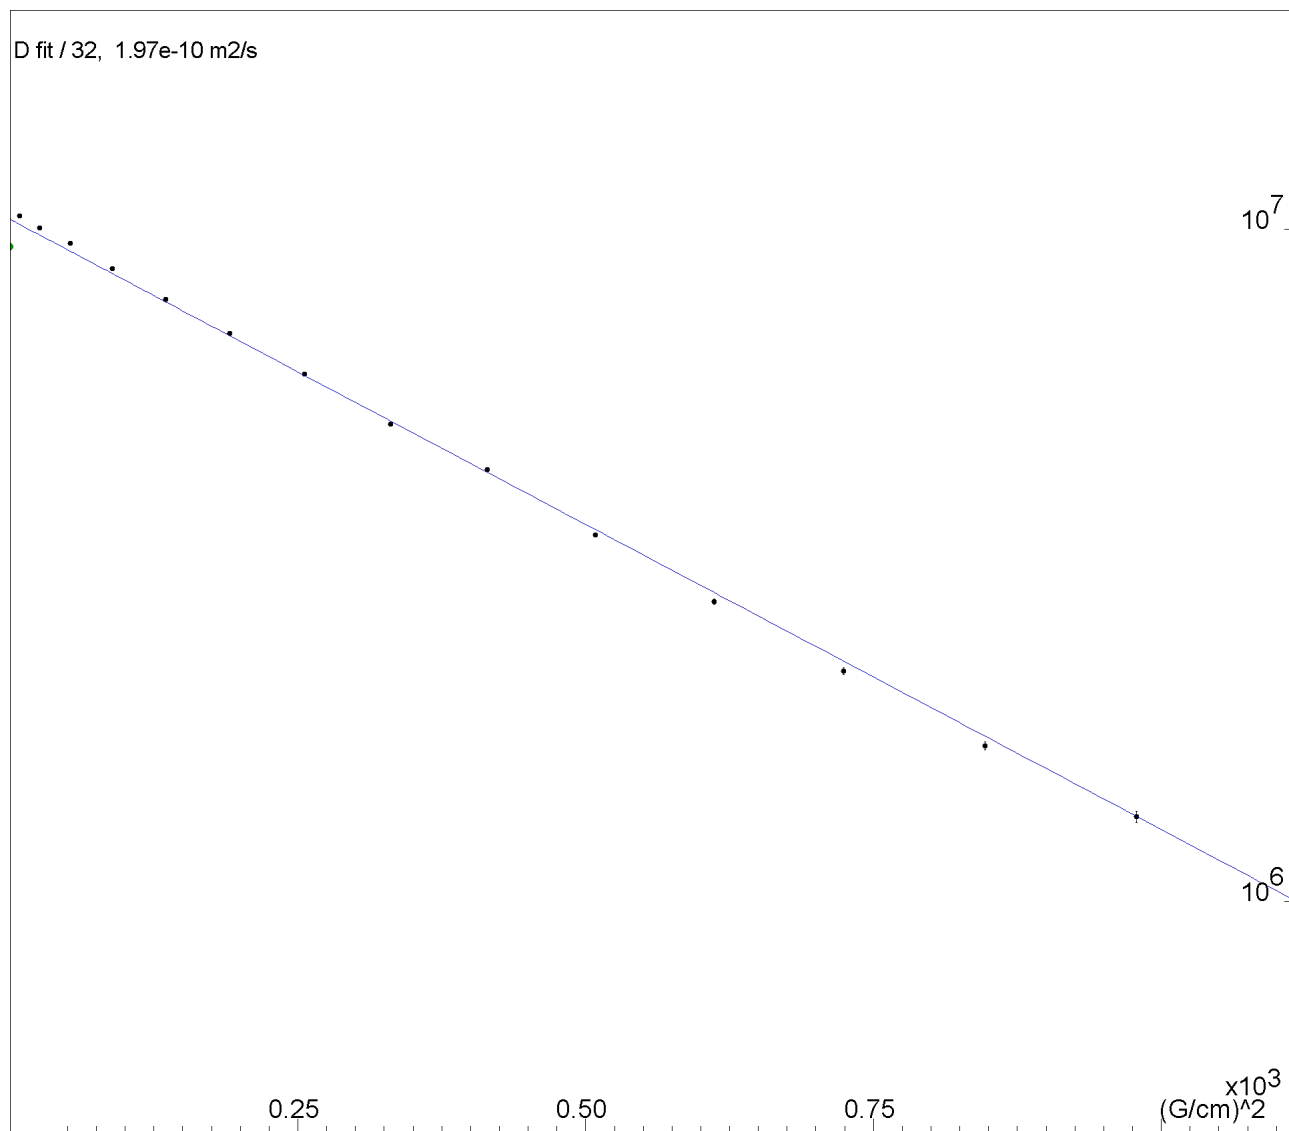

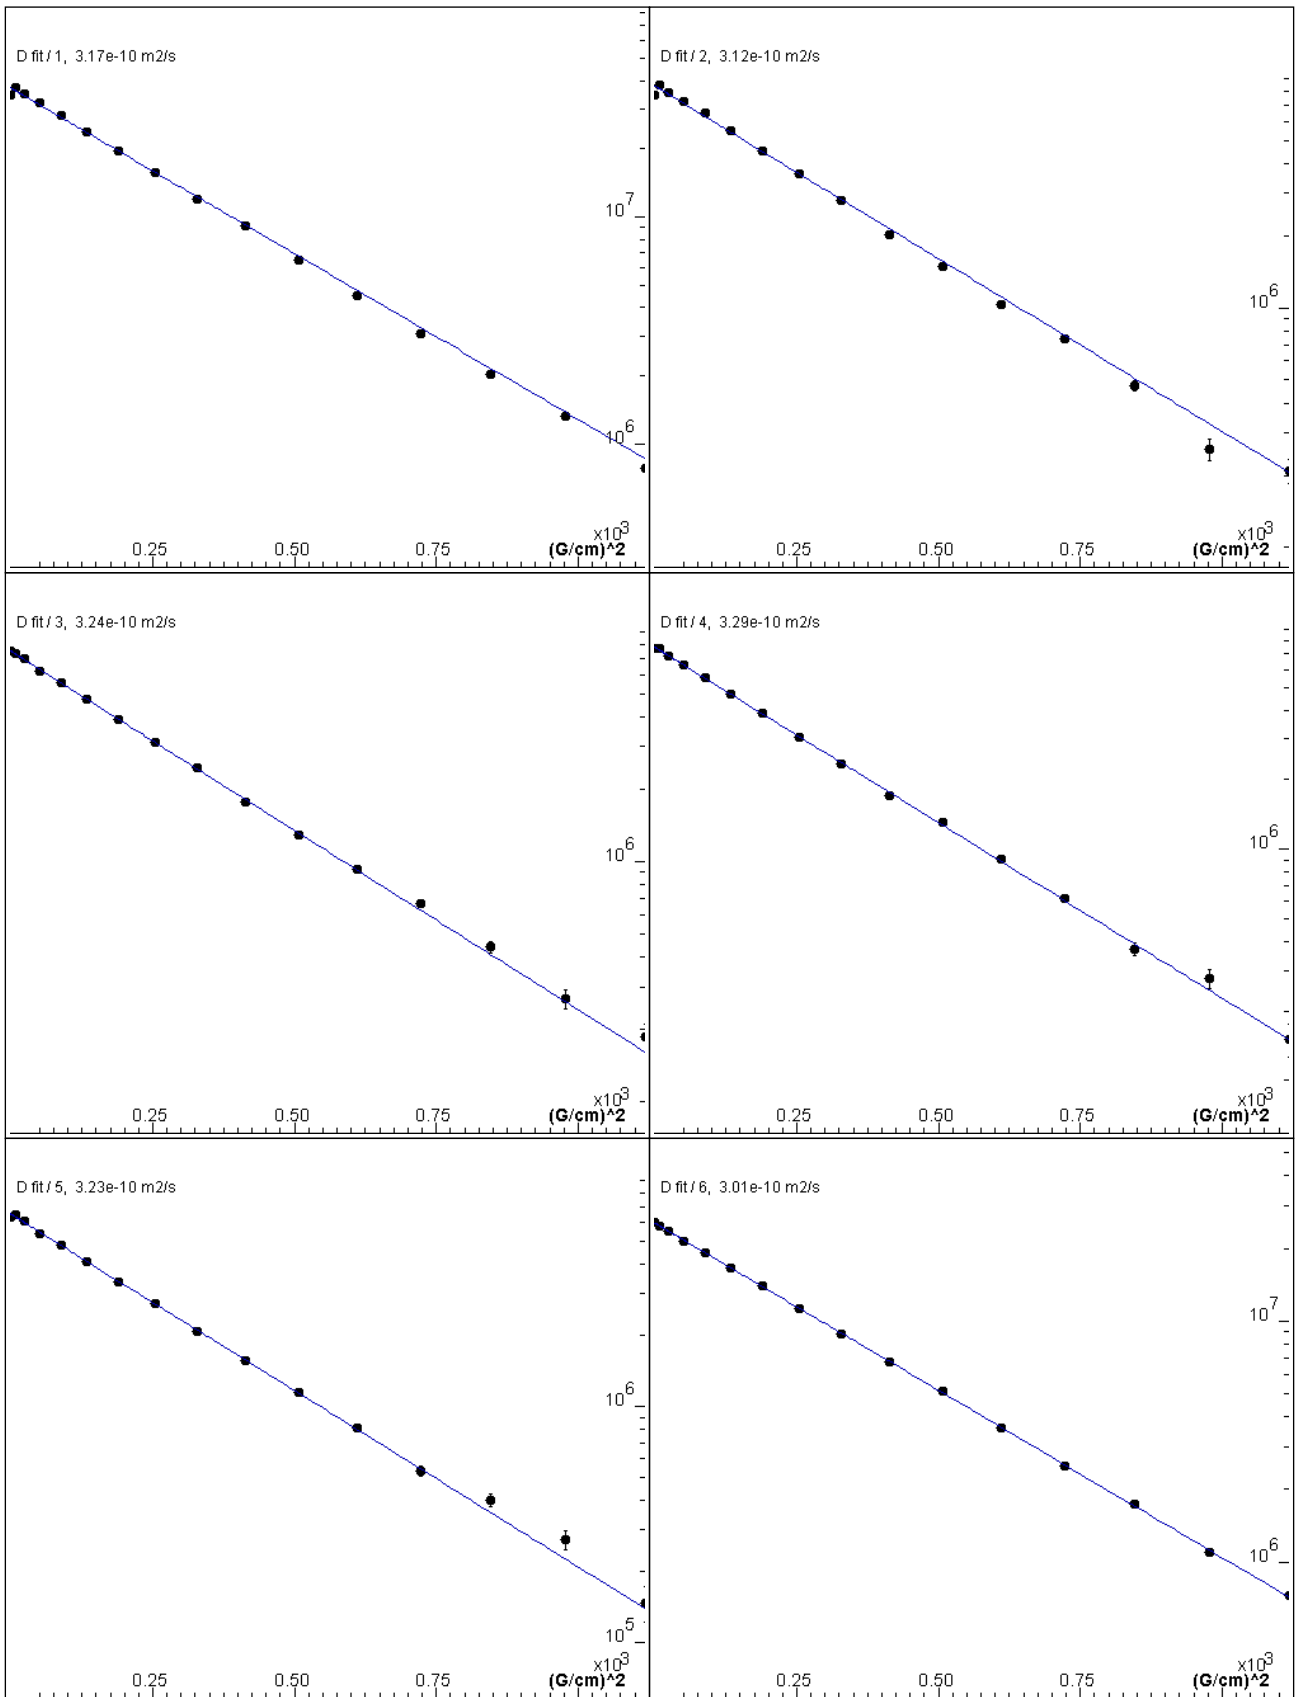

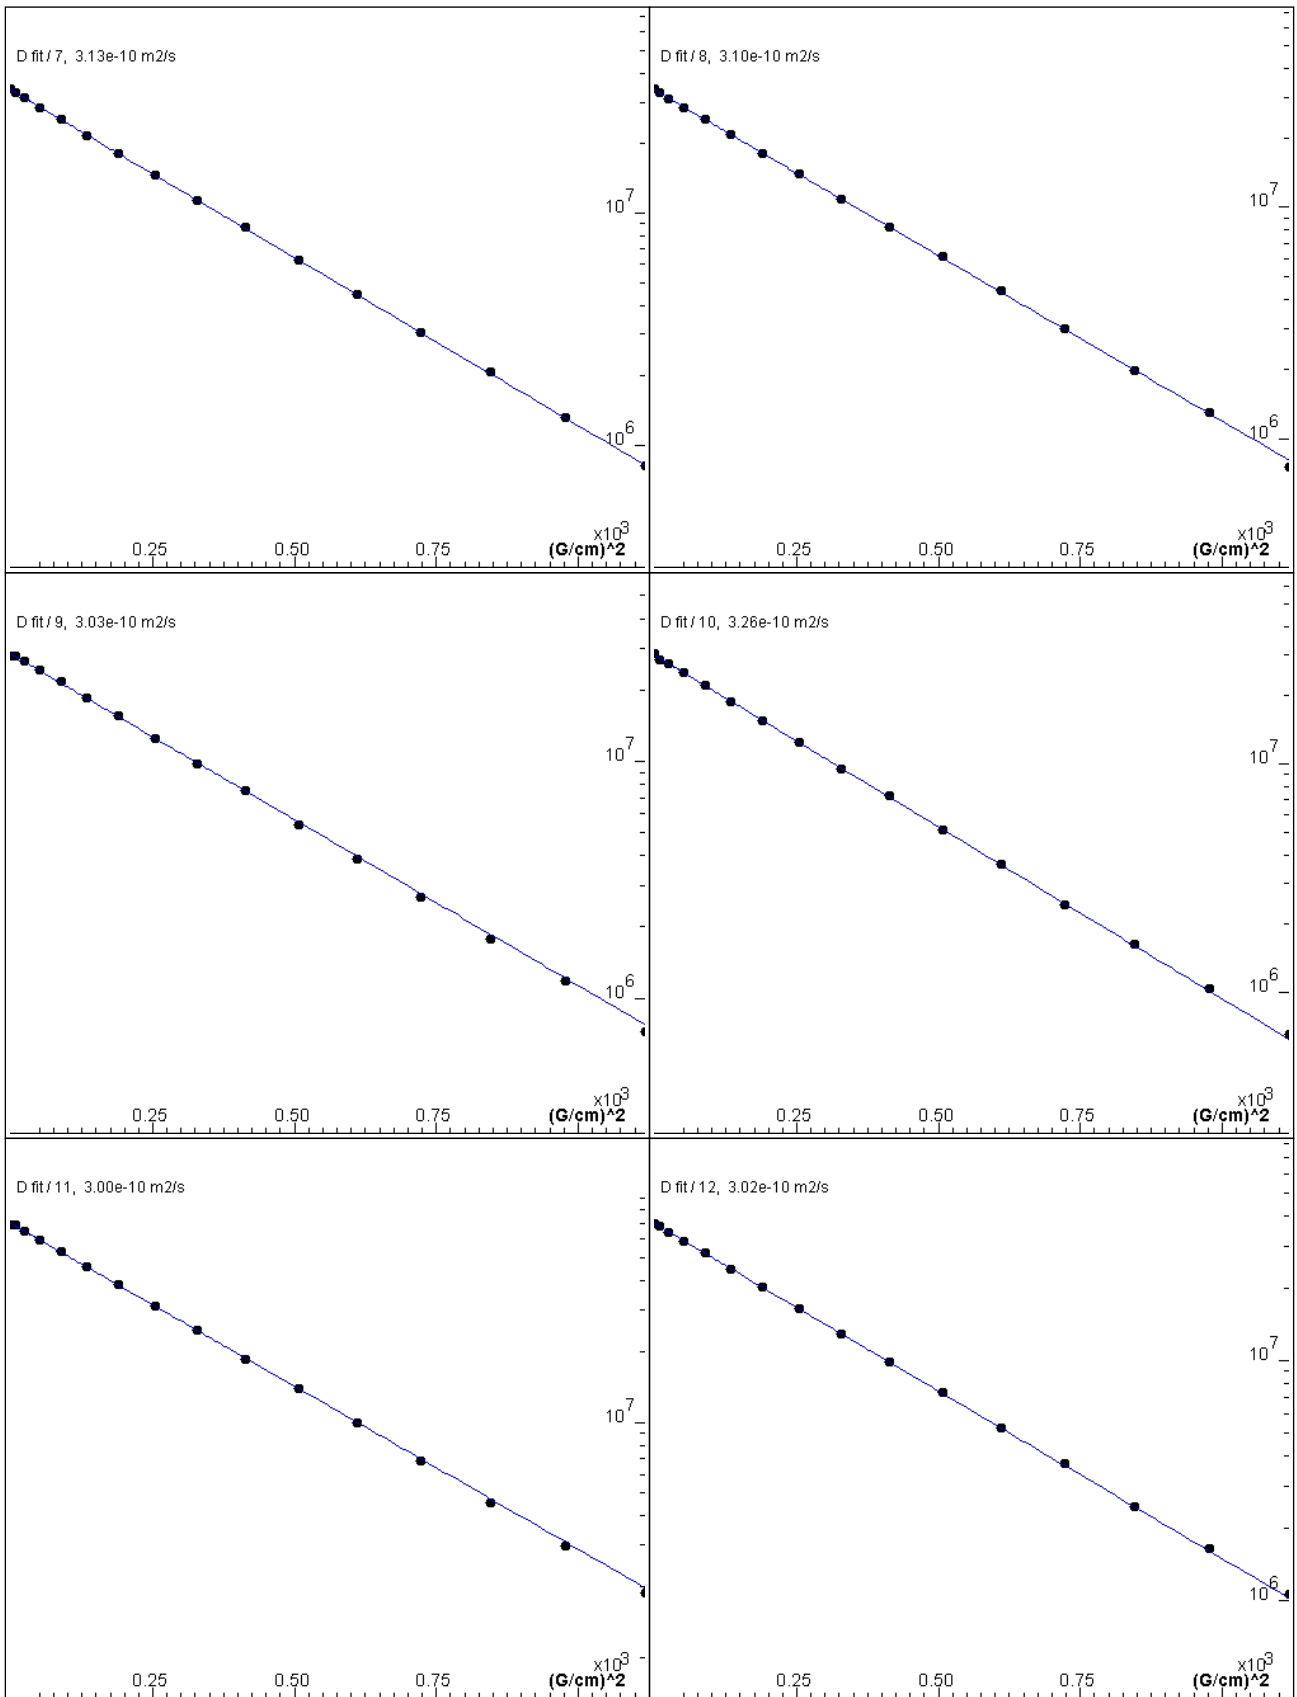

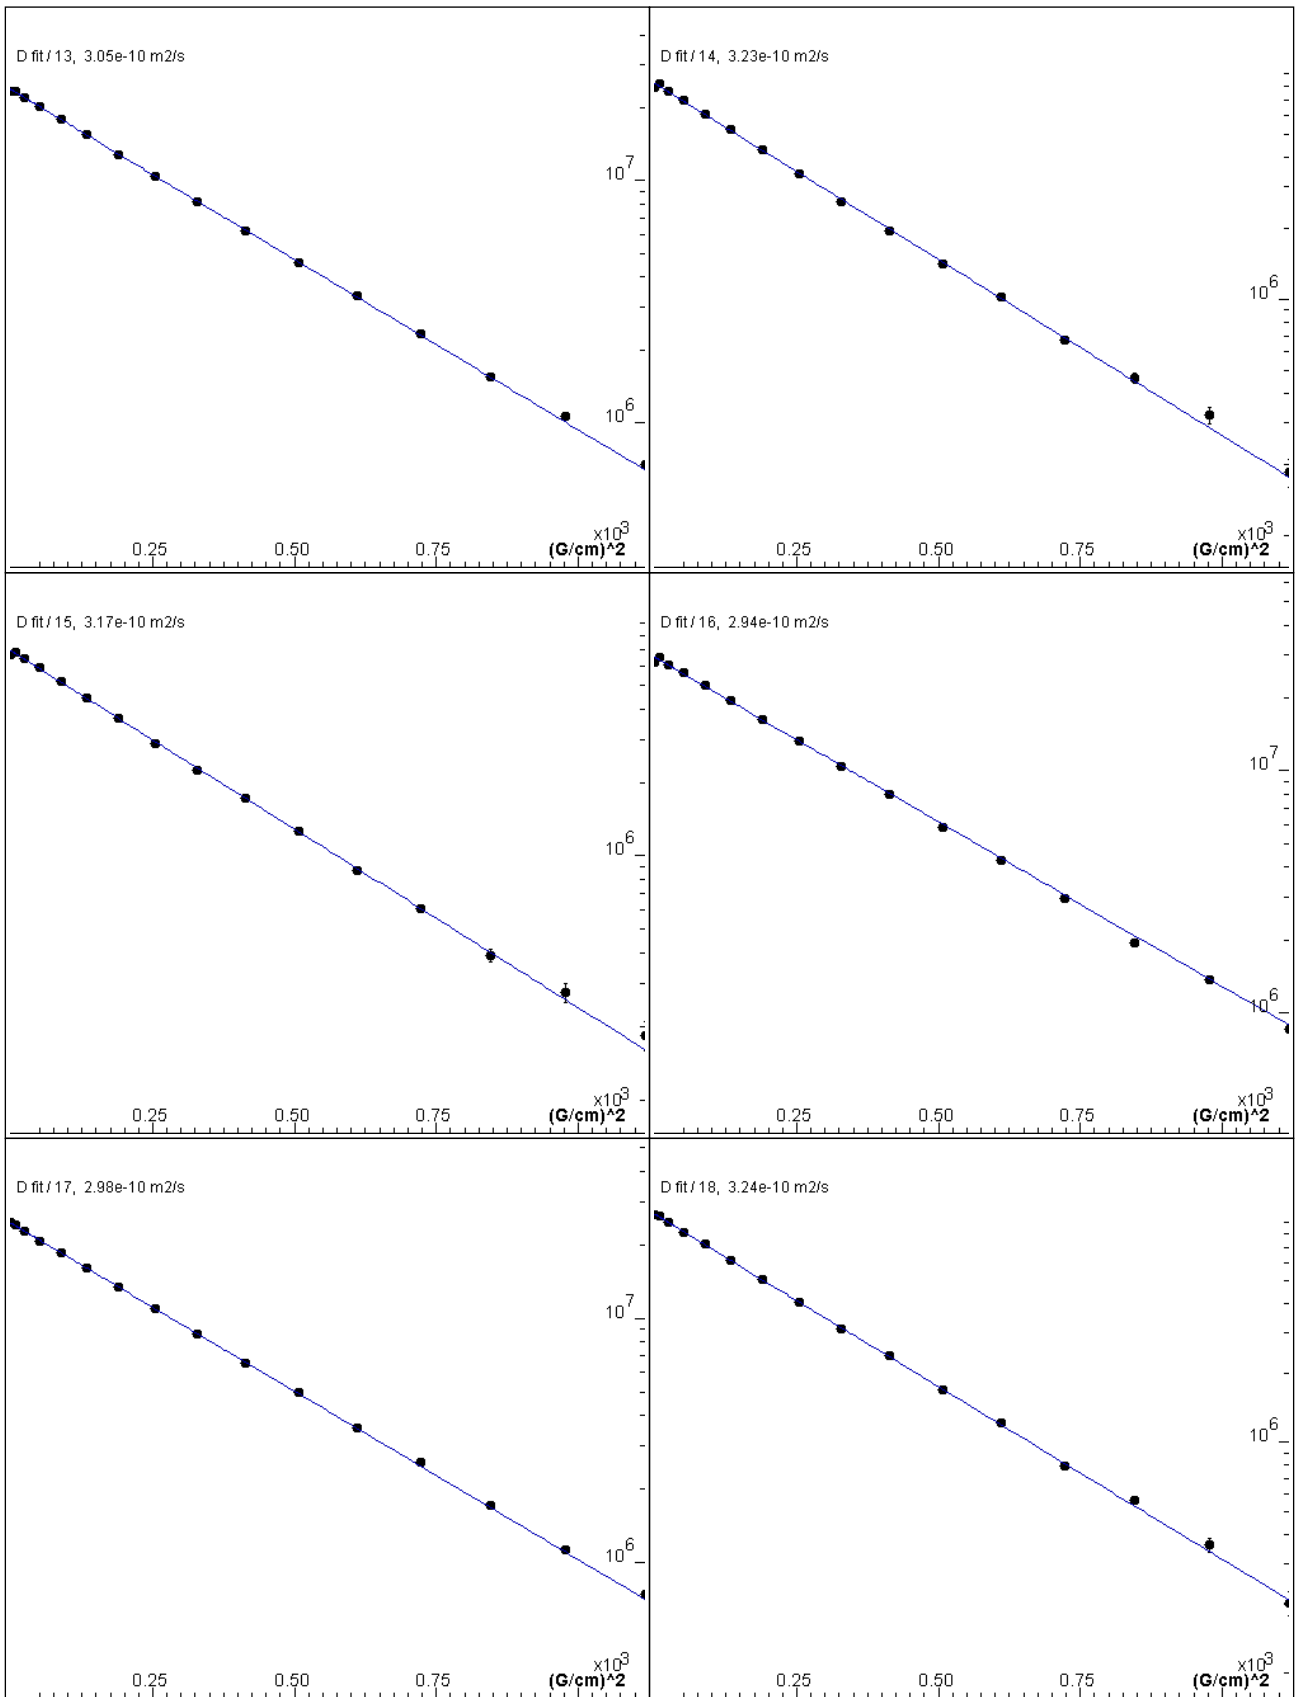



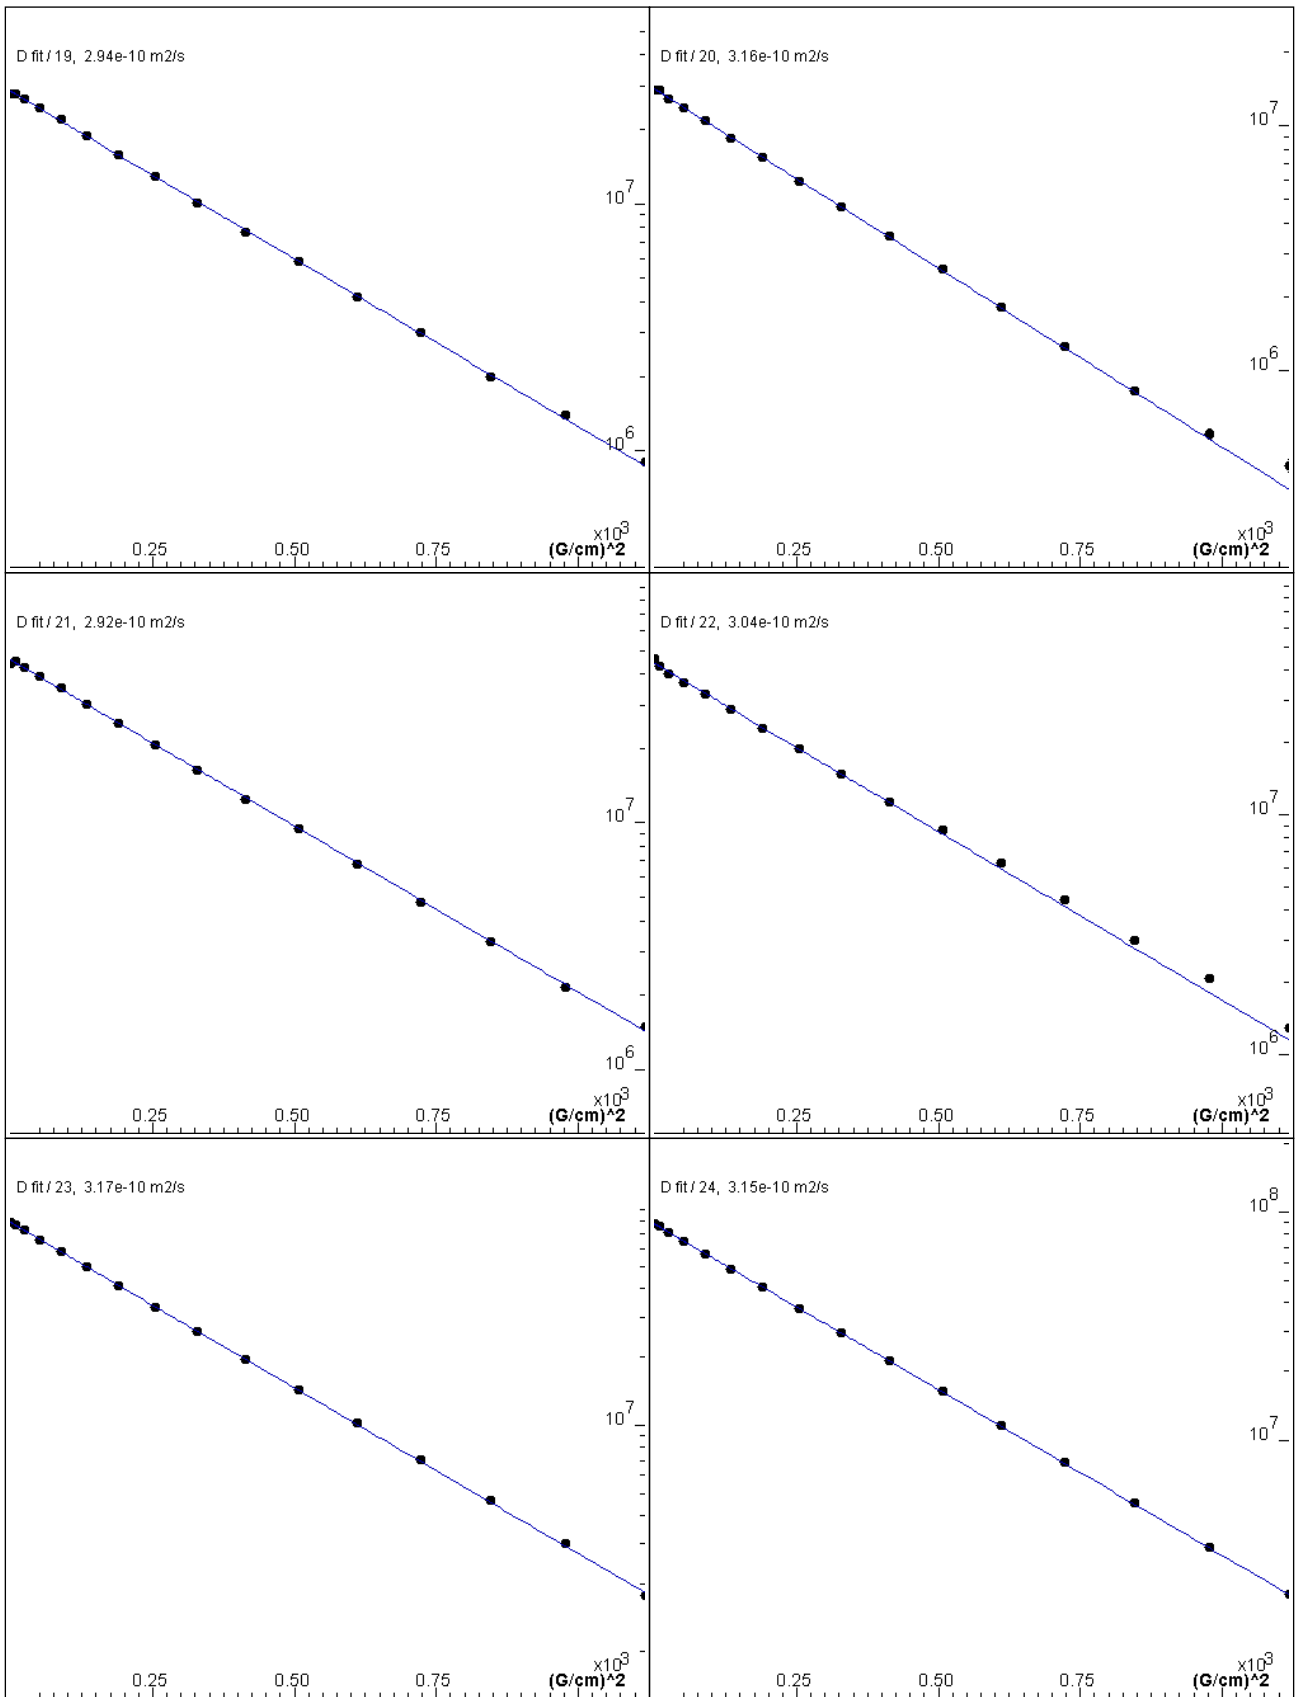

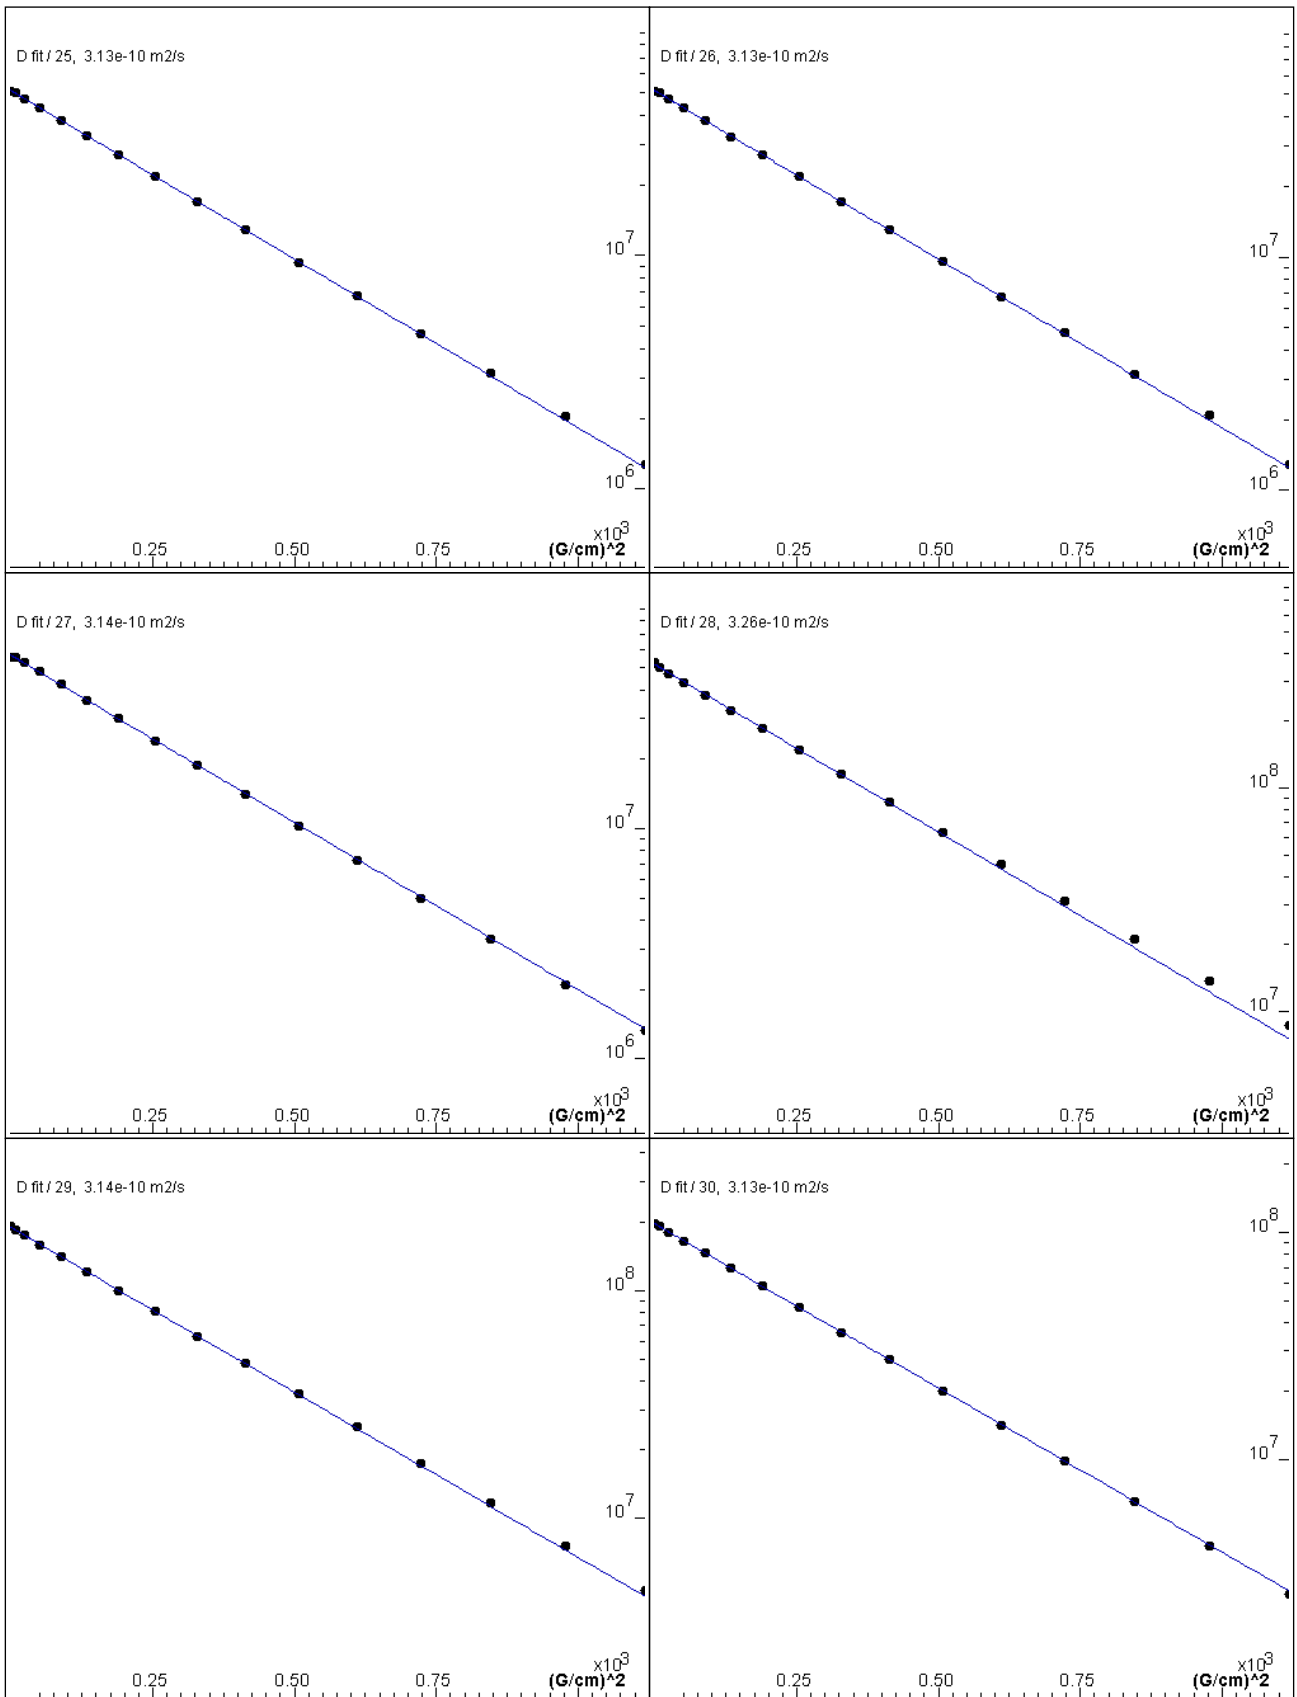

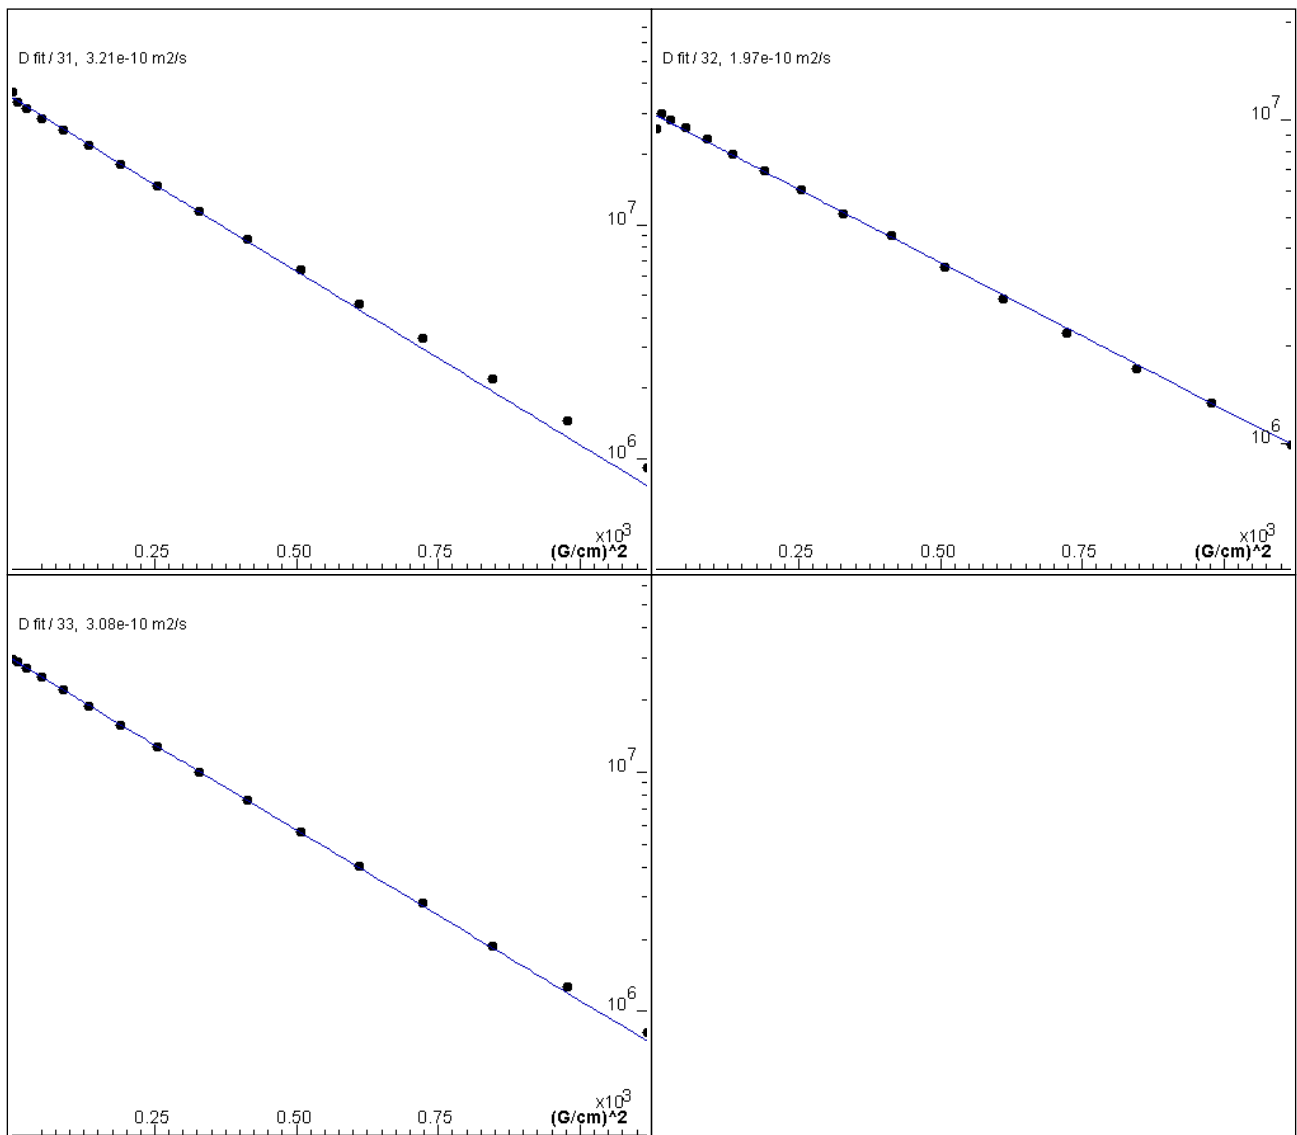

Supplement: c6cc10085f2.pdf [file c6cc10085f2.pdf]
